# Supplementary material for: Systems-level temporal immune-metabolic profile in Crimean-Congo hemorrhagic fever virus infection
Source: PubMed Central journal article supplement — Proc Natl Acad Sci U S A. 2023 Sep 5;120(37):e2304722120. doi: 10.1073/pnas.2304722120 (PMC10500270; doi:10.1073/pnas.2304722120), 2023-09-05
Supplement: pnas.2304722120.sapp.pdf [file pnas.2304722120.sapp.pdf]

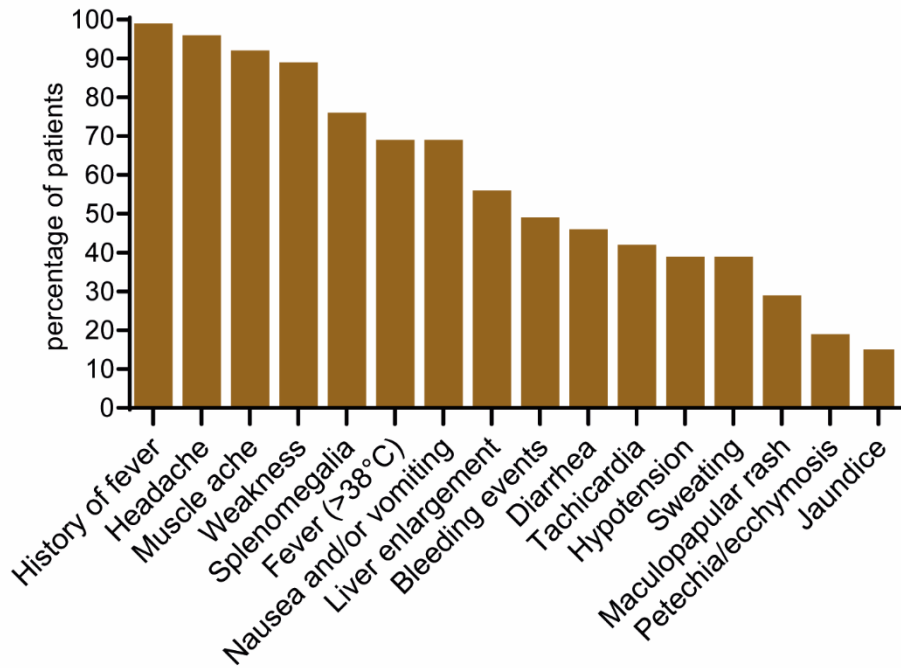

**Supplementary Fig. S1.** Clinical manifestations and symptoms at the time of hospital admission.

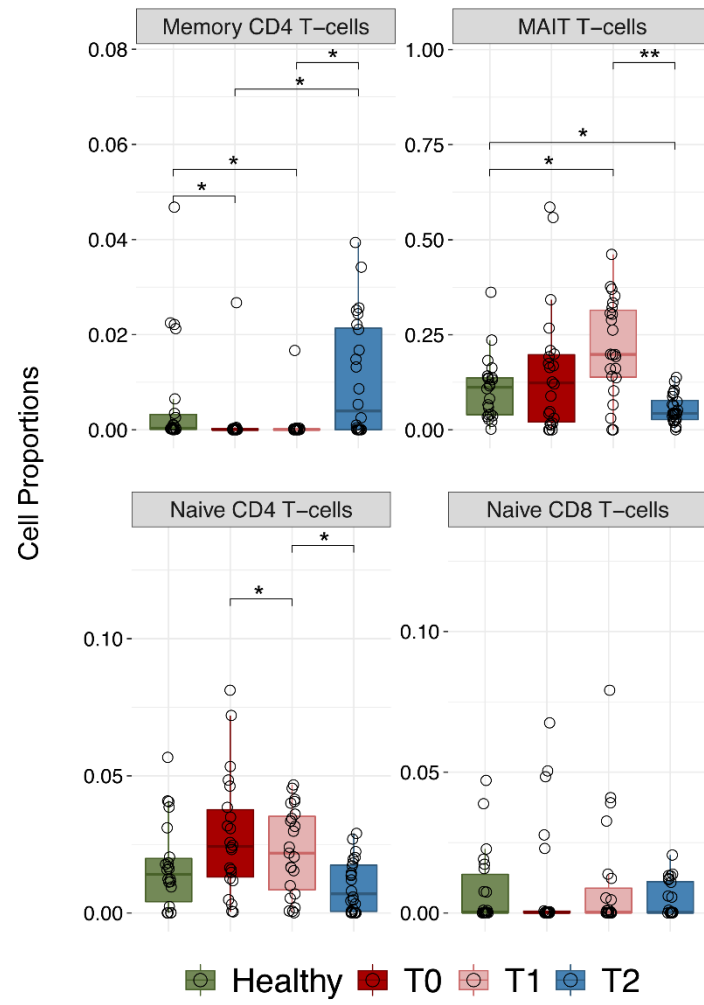

**Supplementary Fig. S2.** Cell proportions identified by DCQ

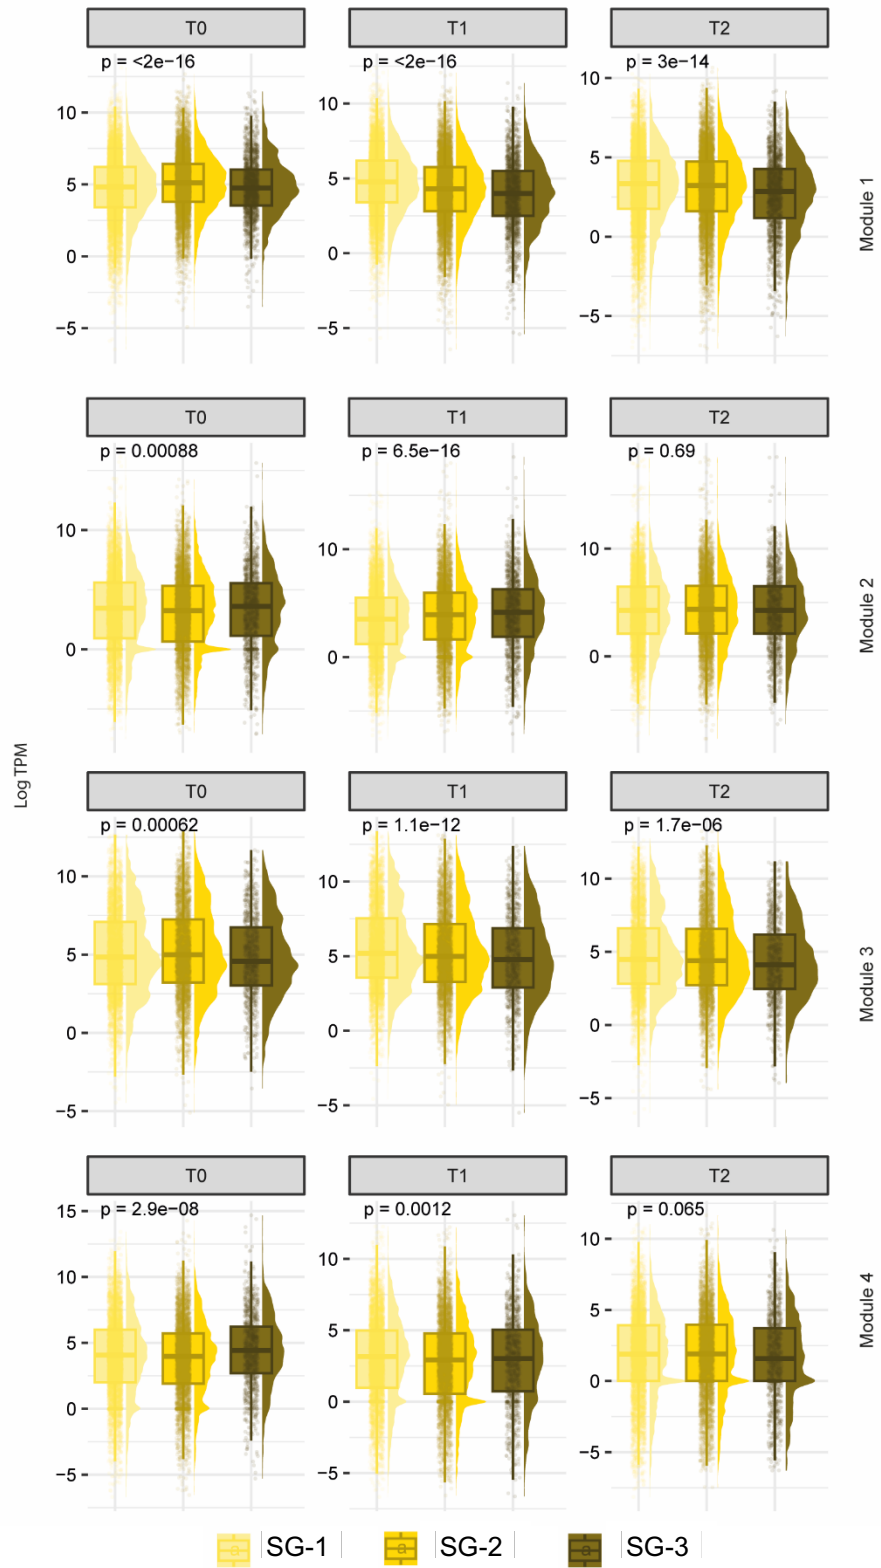

**Supplementary Fig. S3.** Change in gene expression (log TPM) in different severity groups in a different module.

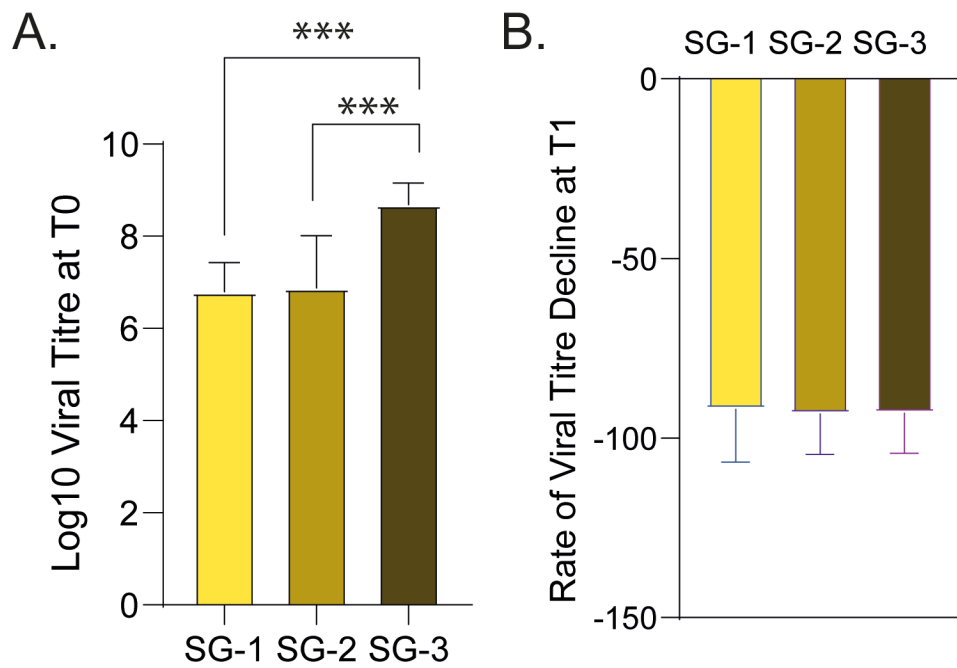

**Supplementary Fig. S4. A.** Viral load ( $\log_{10}$ ) on the day of hospitalization (T0). **B.** Rate of viral load decline in different severity groups at the discharge from hospital (T1). The rate was calculated as follows:  $100 * [(Viral\ load\ at\ T1 - Viral\ load\ at\ T0) / Viral\ load\ at\ T0] * 100$

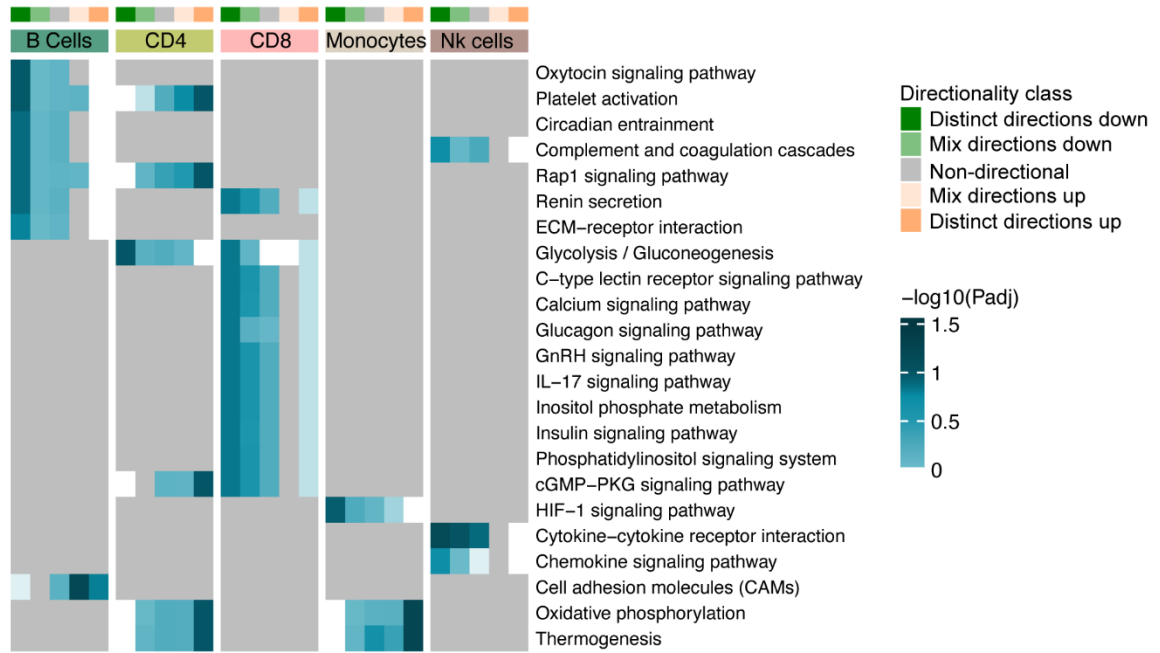

**Supplementary Fig. S5.** gene set enrichment analysis by PIANO in five different immune cells.

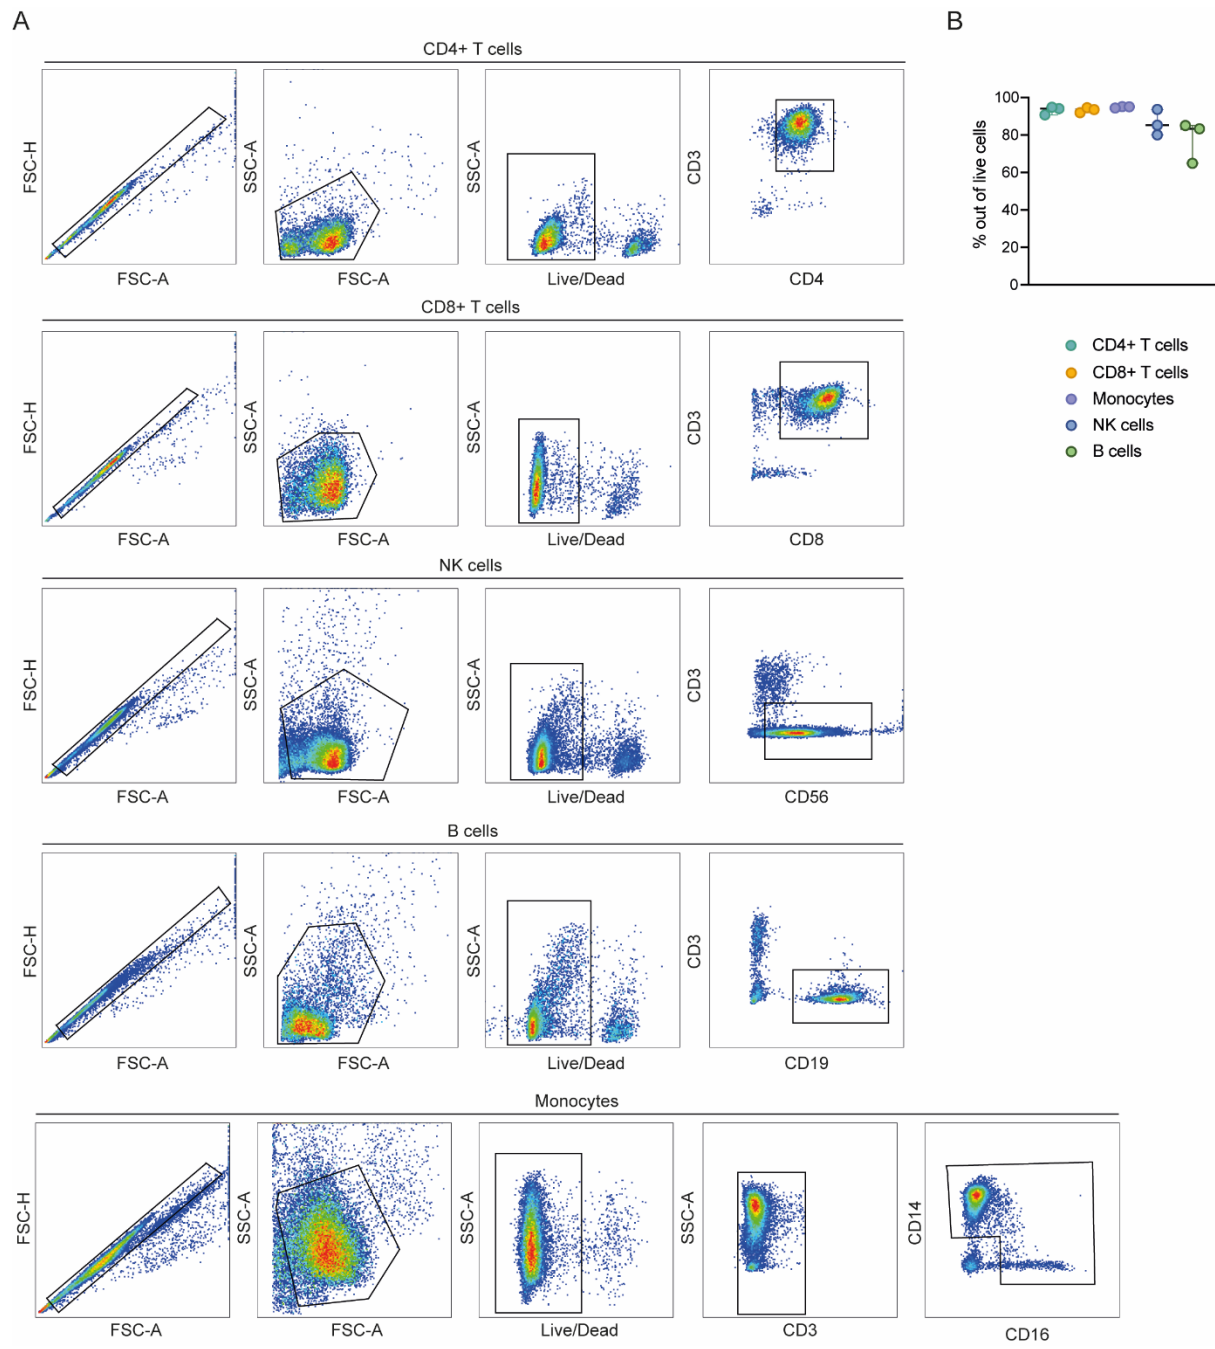

**Supplementary Fig. S6. Cell purity of different immune cells**
